# Supplementary material
Source: publisher figshare collection journal article supplement (https://acs.figshare.com/ndownloader/files/30712106)
Supplement: Supplementary file 1 [file 30712106]

# Supporting Information

## Oxygen Defects Hydrated Vanadium Dioxide/Graphene as the Superior Cathode for Aqueous Zn Battery

Shimin Huang<sup>#a</sup>, Shenggong He<sup>#a</sup>, Haiqing Qin<sup>b</sup>, Xianhua Hou<sup>ac\*</sup>

- <sup>a</sup> *Guangdong Provincial Key Laboratory of Quantum Engineering and Quantum Materials, Guangdong-Hong Kong Joint Laboratory of Quantum Matter, Guangdong Engineering Technology Research Center of Efficient Green Energy and Environment Protection Materials, School of Physics and Telecommunication Engineering, South China Normal University, Guangzhou 510006, China*
- <sup>b</sup> *Guangxi Key Laboratory of Superhard Material, National Engineering Research Center for Special Mineral Material, China Nonferrous Metal (Guilin) Geology And Mining Co., Ltd., Guilin 541004, PR China*
- <sup>c</sup> *SCNU Qingyuan Institute of Science and Technology Innovation Co., Ltd., Qingyuan 511517, China*

---

<sup>#</sup> These authors are contributed equally to this work.

<sup>\*</sup> Corresponding author. Tel: +862039318011

E-mail addresses: [houxianhua@m.scnu.edu.cn](mailto:houxianhua@m.scnu.edu.cn)

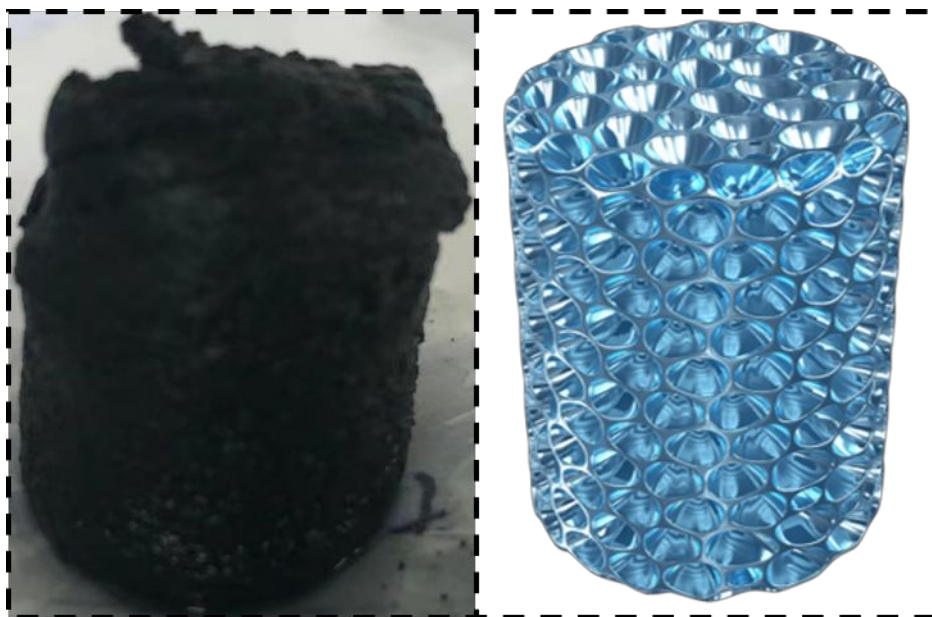

**Figure S1.** Photograph and structure of O<sub>d</sub>-HVO/rG (Diameter = 3 cm).

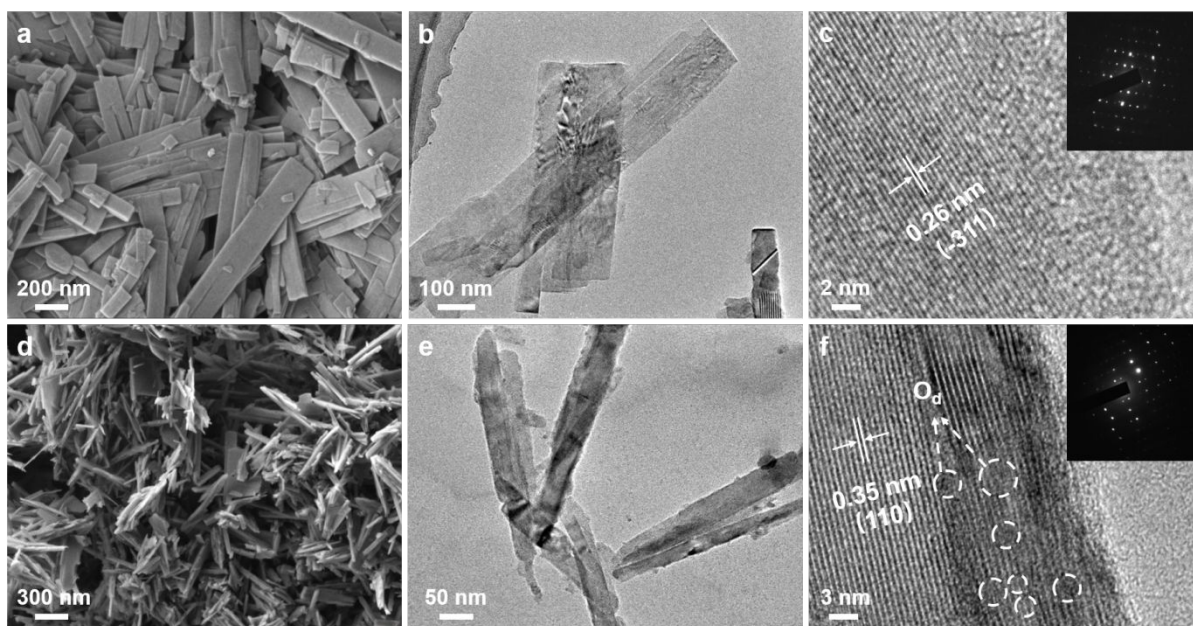

**Figure S2.** SEM and TEM images of pure HVO (a-c) and O<sub>d</sub>-HVO (d-f).

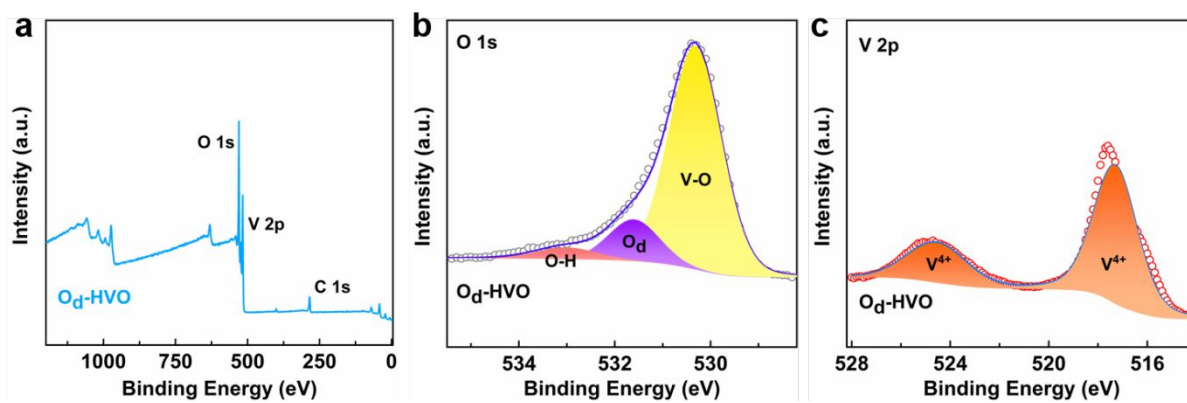

**Figure S3.** XPS spectrum of  $O_d$ -HVO: a) full survey spectra, b) O 1s and c) V 2p.

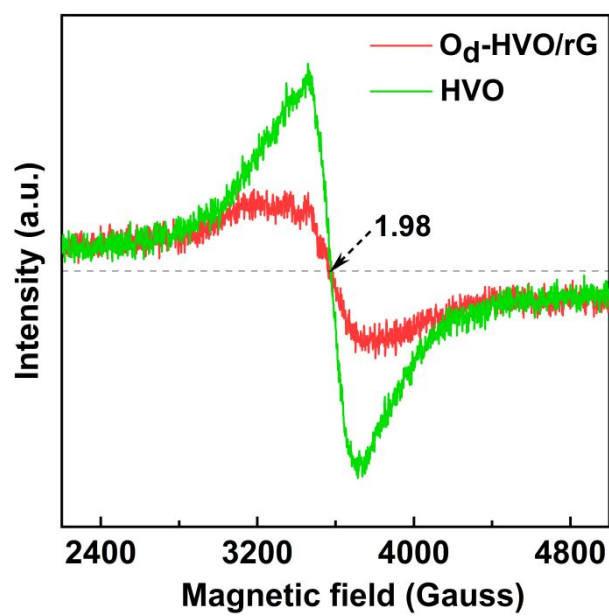

**Figure S4.** EPR spectra of  $O_d$ -HVO/rG and HVO.

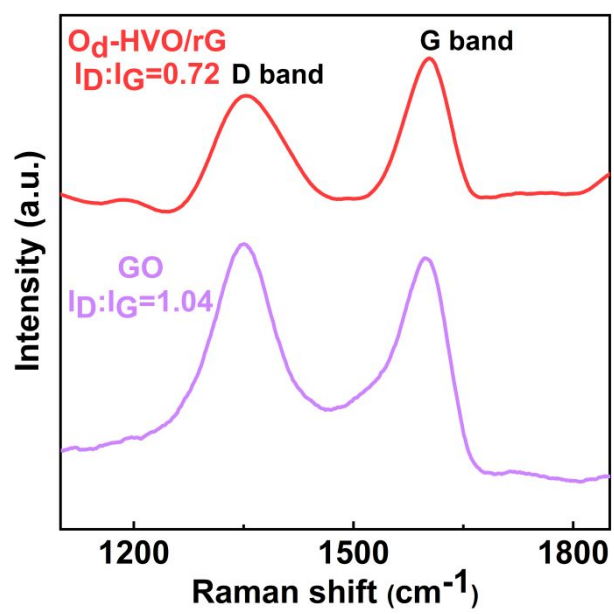

**Figure S5.** Raman spectra of O<sub>d</sub>-HVO/rG and GO.

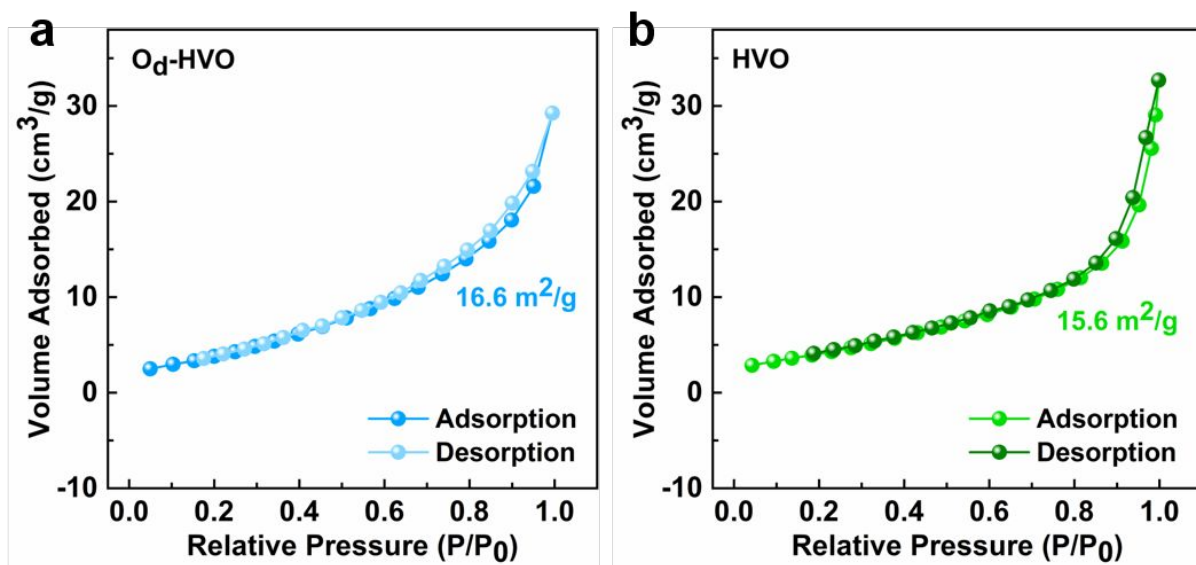

**Figure S6.** Nitrogen adsorption and desorption isotherm of different samples. a)  $O_d$ -HVO, b) HVO nanorods.

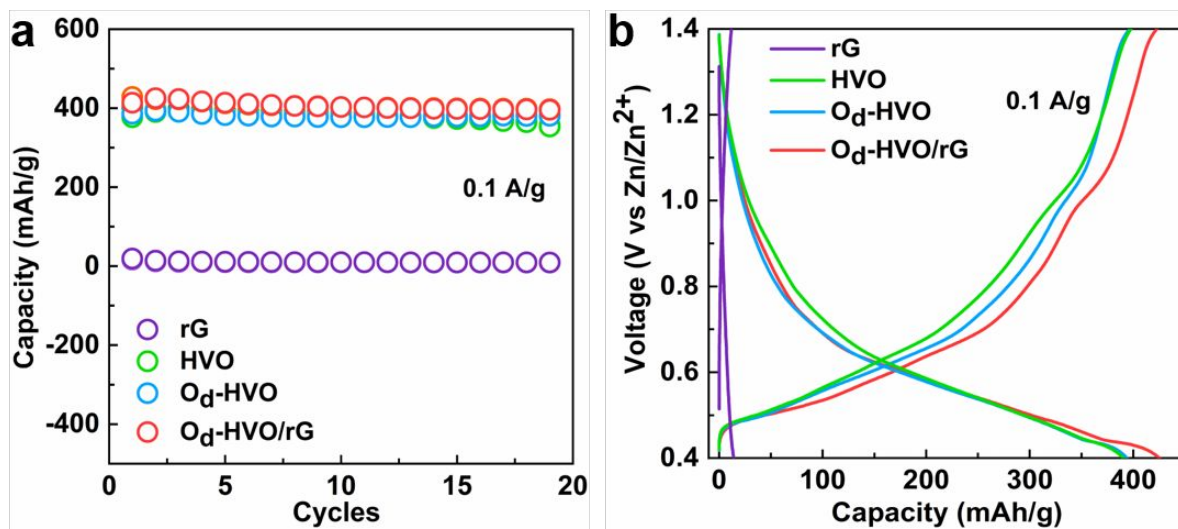

**Figure S7.** a) cycling test at 0.1 A/g, b) GCD curves for all samples.



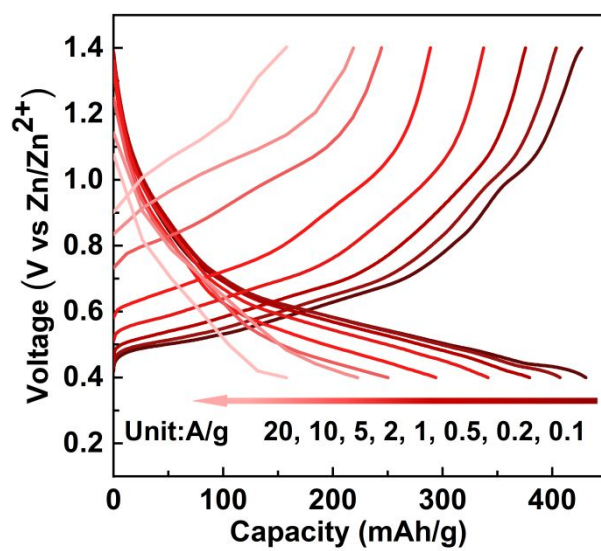

**Figure S8.** Galvanostatic charge and discharge curves of O<sub>d</sub>-HVO/rG cathode at various currents ranging from 0.1 to 20 A/g.

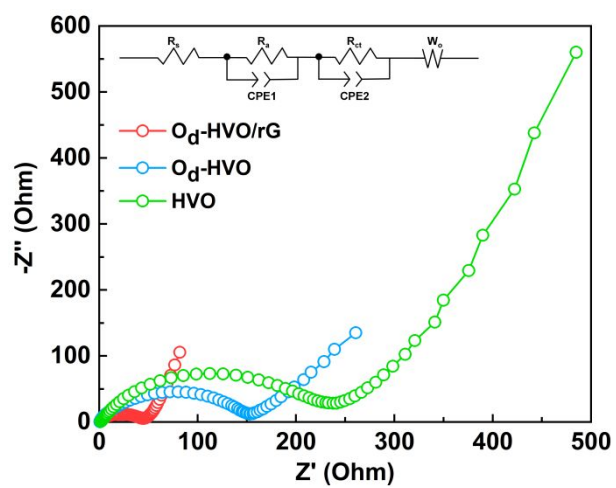

**Figure S9.** EIS impedance curves of O<sub>d</sub>-HVO/rG, O<sub>d</sub>-HVO and HVO.

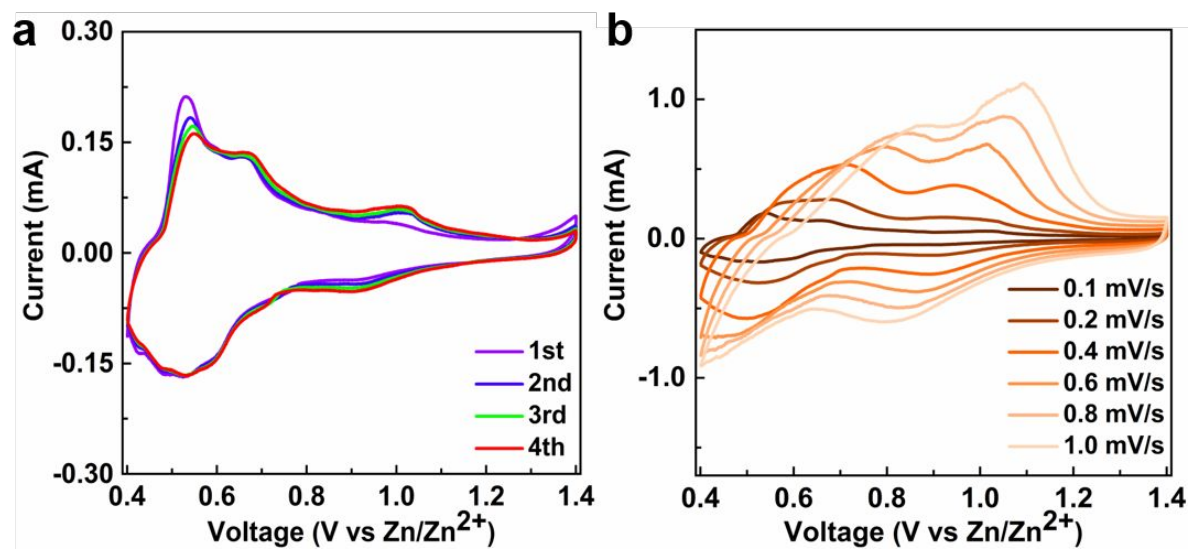

**Figure. S10.** The CV curves of pure HVO nanobelts at a) 0.1 mV/s, b) different scan rates from 0.1 to 1.0 mV/s.

## Tables

**Table S1.** Comparison of the electrochemical performances of recently reported prominent cathode materials.

| Cathode                                                             | Electrolyte                                           | Voltage window | Specific capacity                             | Ref.      |
|---------------------------------------------------------------------|-------------------------------------------------------|----------------|-----------------------------------------------|-----------|
| O <sub>d</sub> -HVO/rG                                              | 3 M ZnSO <sub>4</sub>                                 | 0.4-1.4 V      | 428.6 mAh/g at 0.1 A/g<br>186 mAh/g at 20 A/g | This work |
| pyrene-4,5,9,10-tetraone (PTO)                                      | 2 M ZnSO <sub>4</sub>                                 | 0.36-1.46 V    | 336 mAh/g at 0.04 A/g                         | 40        |
| NVO                                                                 | 2 M ZnSO <sub>4</sub>                                 | 0.2-1.6 V      | 397 mAh/g at 0.2A/g                           | 41        |
| MoS <sub>2</sub>                                                    | 3 M Zn(CF <sub>3</sub> SO <sub>3</sub> ) <sub>2</sub> | 0.2-1.4 V      | 21 mAh/g at 0.1 A/g                           | 42        |
| RGO/VO <sub>2</sub>                                                 | 3 M Zn(CF <sub>3</sub> SO <sub>3</sub> ) <sub>2</sub> | 0.3-1.3 V      | 276 mAh/g at 0.1 A/g                          | 43        |
| LiV <sub>3</sub> O <sub>8</sub>                                     | 1 M ZnSO <sub>4</sub>                                 | 0.6-1.2 V      | 256 mAh/g at 16 mA/g                          | 44        |
| FeHCF                                                               | 1 M Zn(OAc) <sub>2</sub>                              | 0.6-1.8 V      | 54 mAh/g at 0.1 mA/cm <sup>2</sup>            | 45        |
| Ca <sub>0.25</sub> V <sub>2</sub> O <sub>5</sub> ·xH <sub>2</sub> O | 1 M ZnSO <sub>4</sub>                                 | 0.6-1.6 V      | 340 mAh/g at 0.2 C                            | 46        |
